# Supplementary figures and images for: The role ofSox9in collagen hydrogel-mediated chondrogenic differentiation of adult mesenchymal stem cells (MSCs)
Source: Royal Society of Chemistry journal article supplement (doi:10.1039/c8bm00317c), 2018-01-01

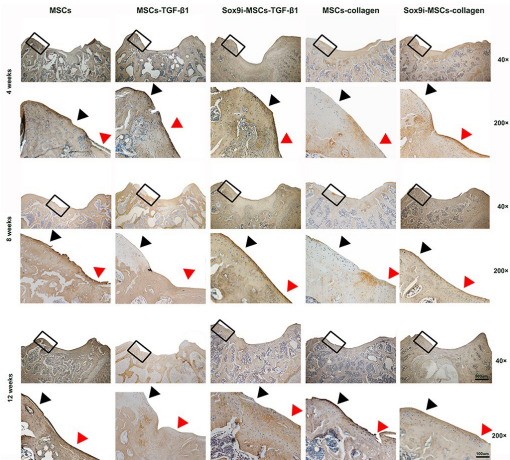

Supplement: c8bm00317c3.pdf [file c8bm00317c3.pdf]
